# Supplementary material for: Molecular and Cellular Interactions of Scavenger Receptor SR-F1 With Complement C1q Provide Insights Into Its Role in the Clearance of Apoptotic Cells
Source: Front Immunol. 2020 Mar 31;11:544. doi: 10.3389/fimmu.2020.00544 (PMC7137648; doi:10.3389/fimmu.2020.00544)
Supplement: Supplementary file 1 [file Data_Sheet_1.pdf]

## Supplementary Material

# Molecular and cellular interactions of scavenger receptor SR-F1 with complement C1q provide insight into its role in the clearance of apoptotic cells

Catherine Wicker-Planquart, Samy Dufour, Pascale Tacnet-Delorme, Isabelle Bally, Yves Delneste, Philippe Frachet\*, Dominique Housset, Nicole M Thielens\*

\* Correspondence: Nicole M. Thielens: [nicole.thielens@ibs.fr](mailto:nicole.thielens@ibs.fr)  
Philippe Frachet: [philippe.frachet@ibs.fr](mailto:philippe.frachet@ibs.fr)

### 1 Supplementary Tables

Table S1 : Oligonucleotides

| Name       | Sequence                                                            |
|------------|---------------------------------------------------------------------|
| T7         | TAATACGACTCACTATAGGG                                                |
| Pac R2     | CATCAGTGATGGTGATGATGATGATGATGCTTAATTAAAGTGTCCCGA<br>CTGCCAGAGCC     |
| BGHRv      | TAGAAGGCACAGTCGAGG                                                  |
| PacF2      | CACTTTAATTAAGCATCATCATCATCACCATCACTGATGACCTTG<br>AATTTGGGGAGTGGG    |
| 221R       | CATCAGTGATGGTGATGATGATGATGATGCTTAATTAAGTGGCAT<br>TCGGGACCCAC        |
| 353R       | CATCAGTGATGGTGATGATGATGATGATGCTTAATTAAAGAGCCACAG<br>TCTTCCCAAAGGTAC |
| 289F       | CTGCGAGCCGGGCTGGCAAGGTACCCAGTGCCAGCAGC                              |
| 289R       | GCTGCTGGCACTGGGTACCTTGCCAGCCCGGCTCGCAG                              |
| 382F       | GGGGCCCAGCTGCCAAGCTTCCTGCCAGCCG                                     |
| 382R       | CGGCTGGGCAGGAAGCTTGGCAGCTGGGCCCC                                    |
| 393F       | CCCAGCCGGTTTCCATGGTAACCAATGCTCAGTTCCTTGTGAATG                       |
| 393R       | CATTCACAAGGAAGTGGCATTGGTTACCATGGAAACCGGCTGGG                        |
| SRF1-stopF | CCAGGCCACCAGAACCCTAGTTTAAACGGCCGCTCGAGATGGAGAGC                     |
| SRF1-stopR | GCTCTCCATCTCGAGCGGCCGTTTAAACTAGGGTTCTGGTGGCCTGG                     |

## 2 Supplementary Figures

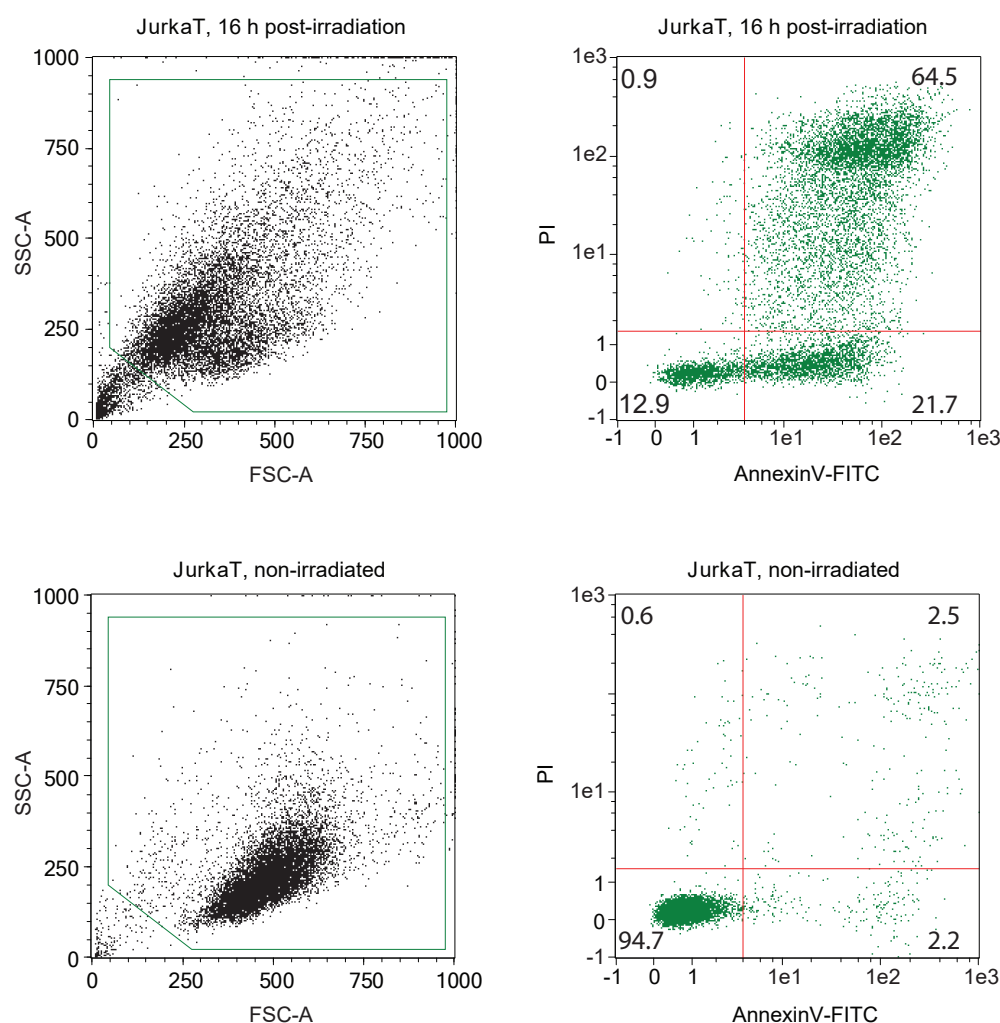

**Figure S1: Analysis of the apoptotic state of JurkaT cells used in the phagocytosis assays.** JurkaT cells were UVB-irradiated (312 nm) and then maintained for 16 h in cell culture. Apoptosis was assessed by flow cytometry using the Annexin V-FITC Kit (MACS MiltenyiBiotec) according to the manufacturer's instructions. FSC/SSC and AnnexinV/PI dot plots are shown for the irradiated and the control populations. The percent of AnnexinV-/PI-, AnnexinV-/PI+, AnnexinV+/PI- and AnnexinV+/PI+ in the selected population (green gates) are indicated. A representative experiment is shown.

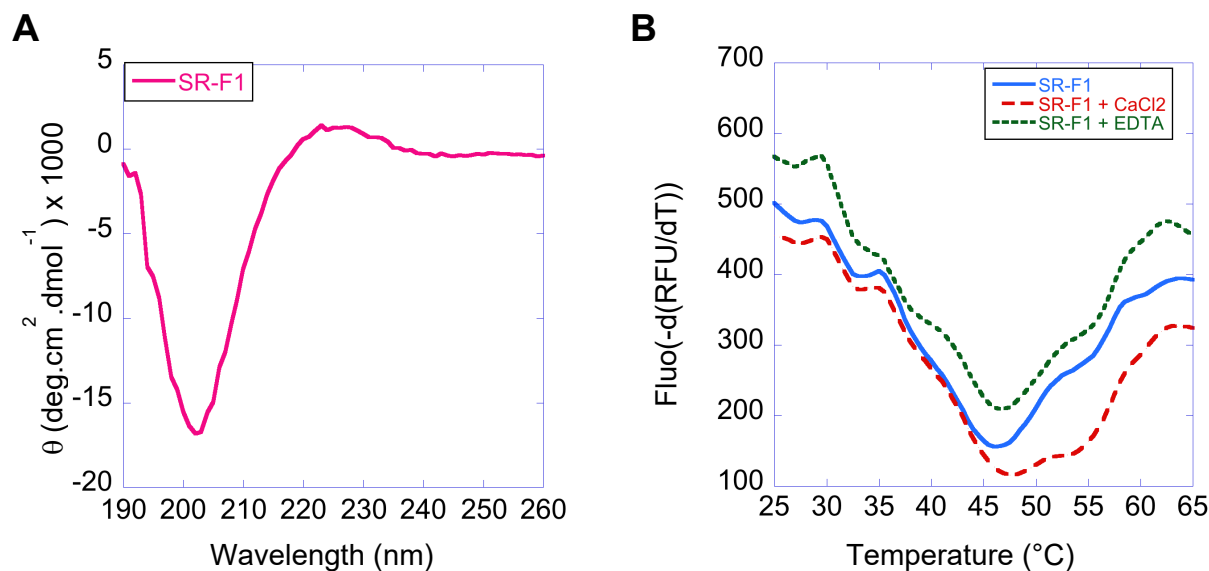

**Figure S2.** (A) CD spectra of SR-F1(20-421). Protein was dialyzed against 10 mM sodium phosphate, 150 mM NaF (pH 8) and used at a concentration of 8  $\mu$ M. Ten spectra were acquired in the far-UV region (200-260 nm) at a scan rate of 20 nm/min. (B) Thermal shift analysis of SR-F1 stability in TBS buffer, in the presence of 2 mM CaCl<sub>2</sub> or 2 mM EDTA.

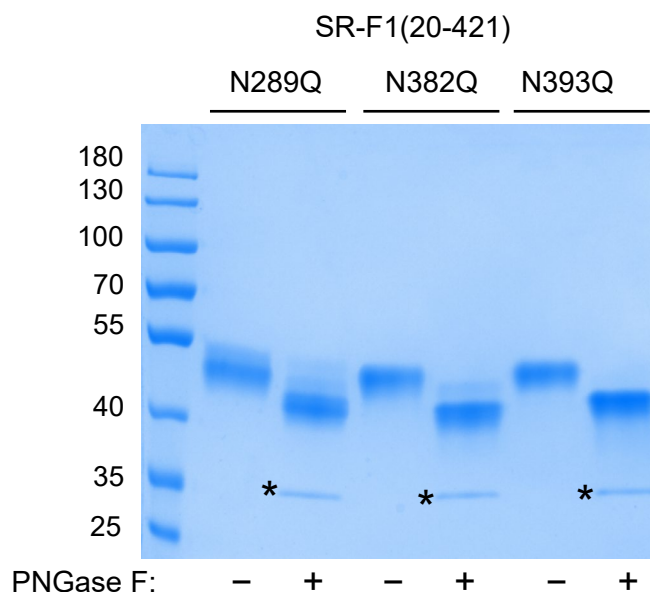

**Figure S3. PNGase F deglycosylation of SR-F1(20-241) proteins.** Proteins were digested by PNGase F as indicated in Materials and Methods and analysed by SDS-PAGE on a 12% acrylamide gel under unreduced conditions. Two  $\mu$ g of each protein were loaded on the gel. The molecular masses (kDa) of the marker are indicated. The band corresponding to PNGase F is indicated by a star.

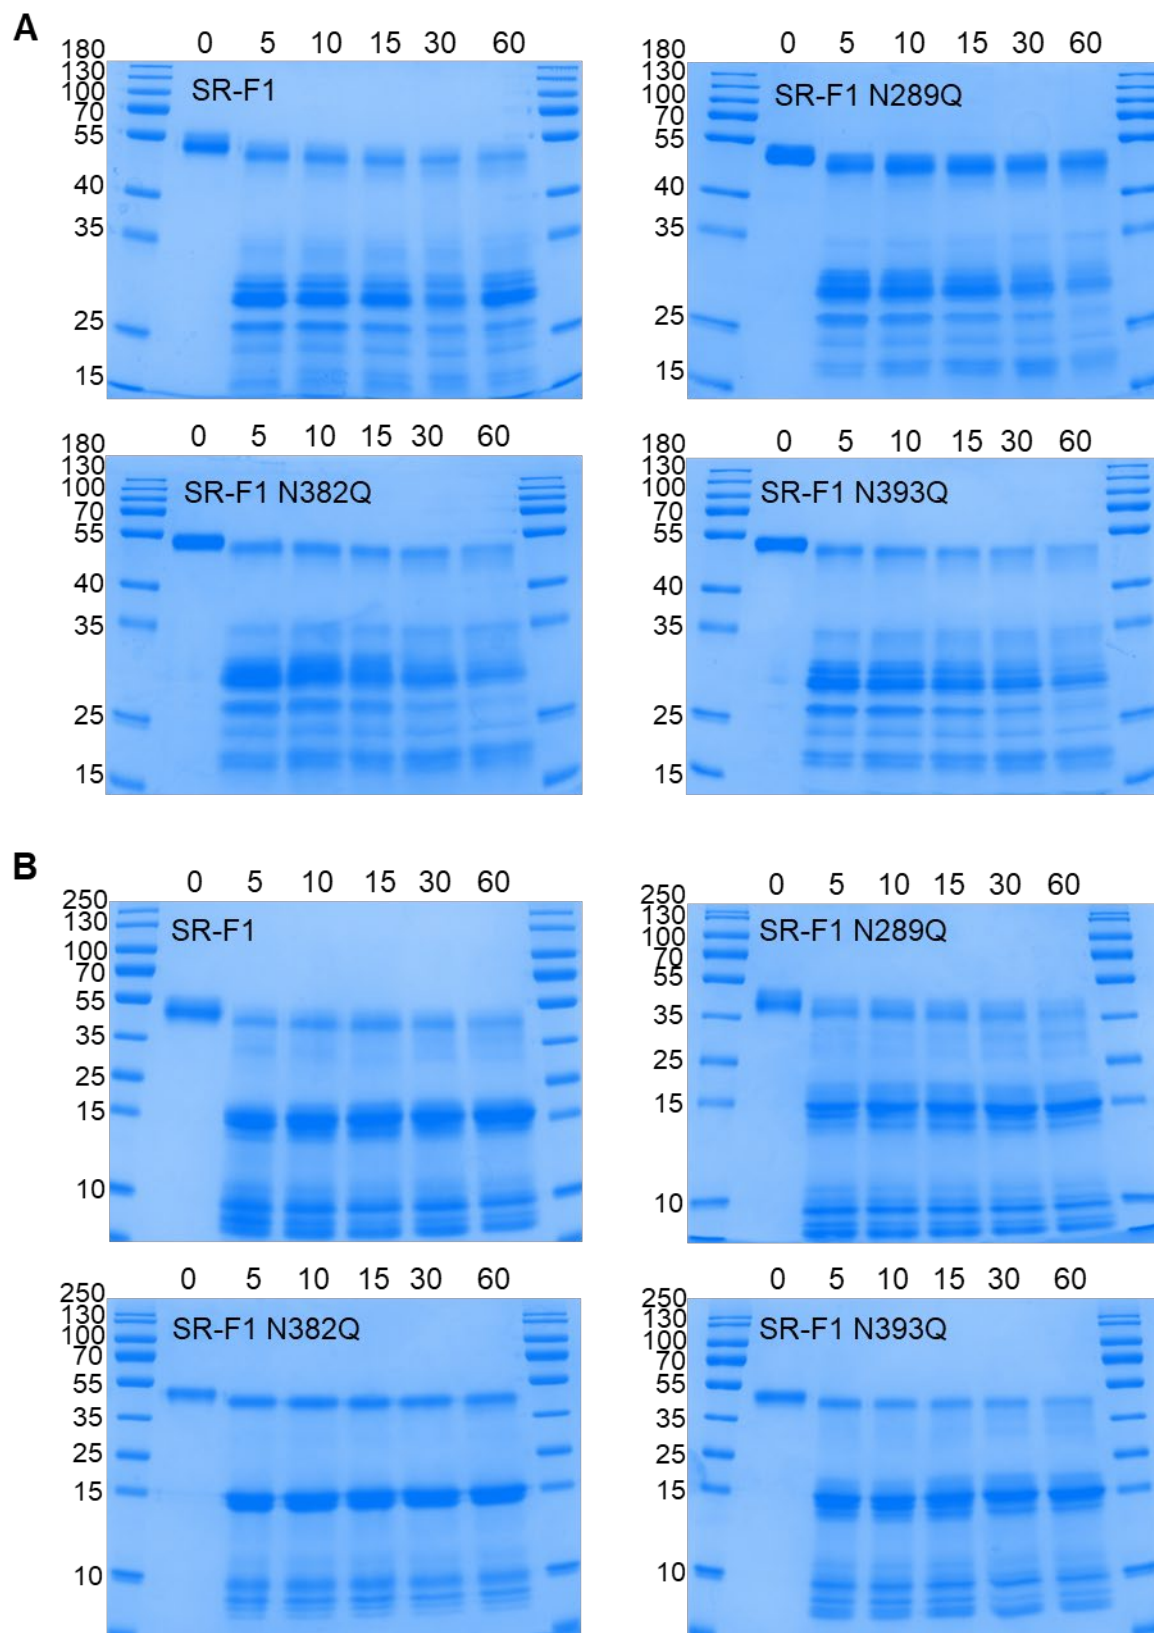

**Figure S4. SDS-PAGE analysis of the proteolytic digestion of SR-F1(20-421) and its mutants lacking one N-glycosylation site.** Limited proteolysis of the recombinant proteins (2  $\mu$ g) was performed in TBS-2 mM  $\text{CaCl}_2$  at 37  $^\circ\text{C}$  by addition of 0.1% trypsin (**A**) or chymotrypsin (**B**) for 0, 5, 10, 15, 30, and 60 min (indicated above the wells). The molecular masses of the protein mass markers (Fermentas) are indicated.

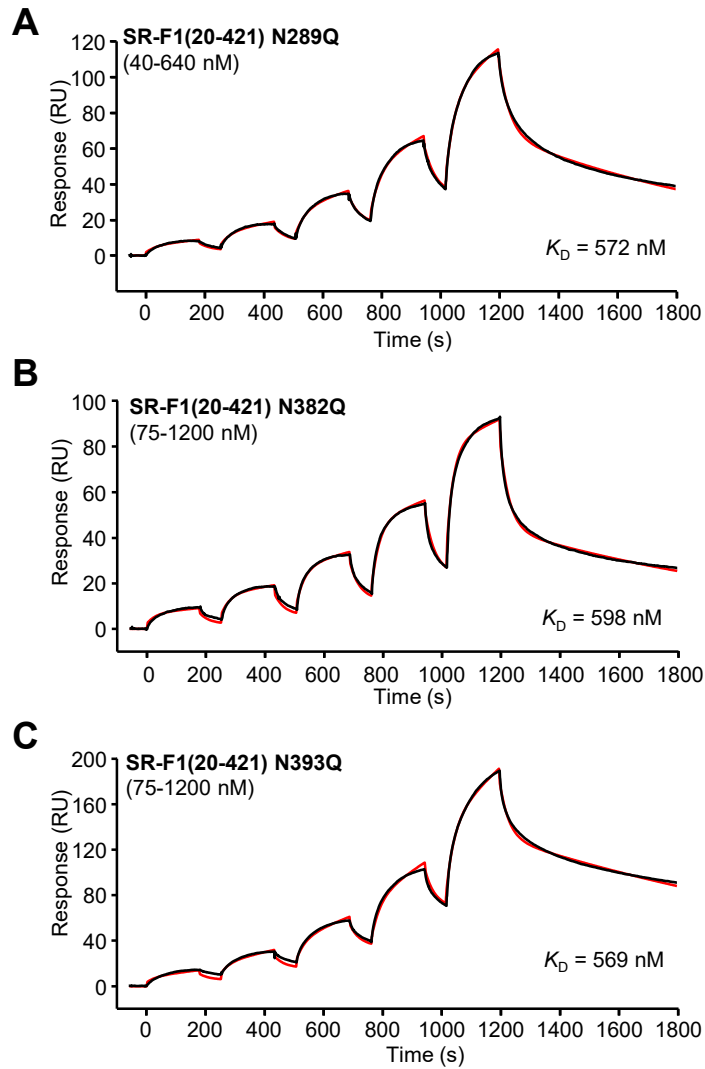

**Figure S5. SPR analyses of the interaction of SR-F1 deglycosylation mutants with C1q.** SR-F1(20-421) mutants N289Q (A), N382Q (B), N393Q (C) were serially diluted and injected at five increasing concentrations in single cycle kinetics mode over immobilized C1q (16,000 RU) in TBS-Ca-P at a flow rate of 20  $\mu$ l/min. Fits are shown as red lines and apparent  $K_D$  values were obtained by global fitting of the data to a two-state reaction model. The data shown are representative of 2 separate experiments on different surfaces.

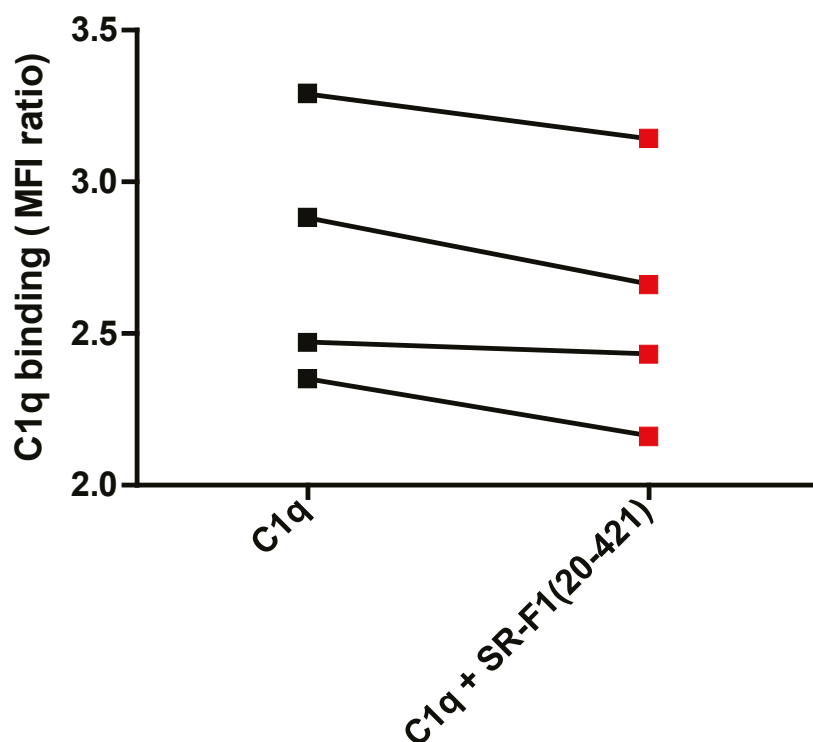

**Figure S6. SR-F1(20-241) inhibits C1q binding to SR-F1 overexpressing THP-1 macrophages.** C1q was preincubated for 30 min at 37°C without or with soluble SR-F1(20-241) protein at a 1:10 molar ratio (C1q:SR-F1) before its binding to SR-F1 overexpressing THP-1 macrophages. Incubation with PMA-treated THP-1 cells and C1q immunostaining were performed as described in Materials and Methods. Four independent experiments are shown. Decreased C1q binding is observed in the presence of soluble SR-F1 compared to controls. MFI ratio: MFI in the presence of C1q/MFI without C1q. MFI, median fluorescence intensity.

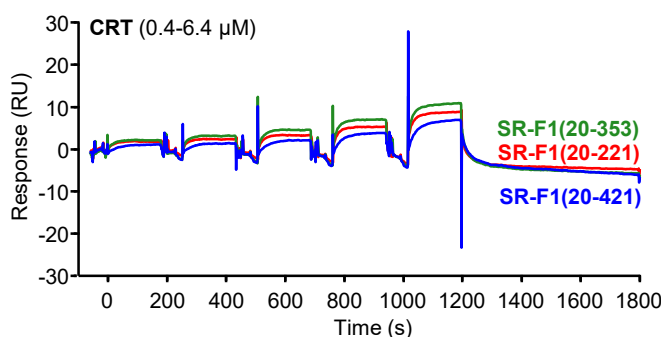

**Figure S7. SPR analyses of the interaction of CRT with SR-F1(20-421), SR-F1(20-353) and SR-F1(20-221).** CRT was serially diluted and injected in single cycle mode over covalently immobilized SR-F1(20-421) (4500 RU), SR-F1(20-353) (5800 RU) and SR-F1(20-221) (4700 RU) in TBS-Ca-P at a flow rate of 20  $\mu$ l/min.
